# Supplementary material for: ERα expression in T lymphocytes is dispensable for estrogenic effects in bone
Source: PubMed Central journal article supplement (PMC6026922; doi:10.1530/joe-18-0183), 2018-05-30
Supplement: joe-238-129-s001.pdf [file joe-238-129-s001.pdf]

Control

Lck-ER $\alpha$ <sup>-/-</sup>

A

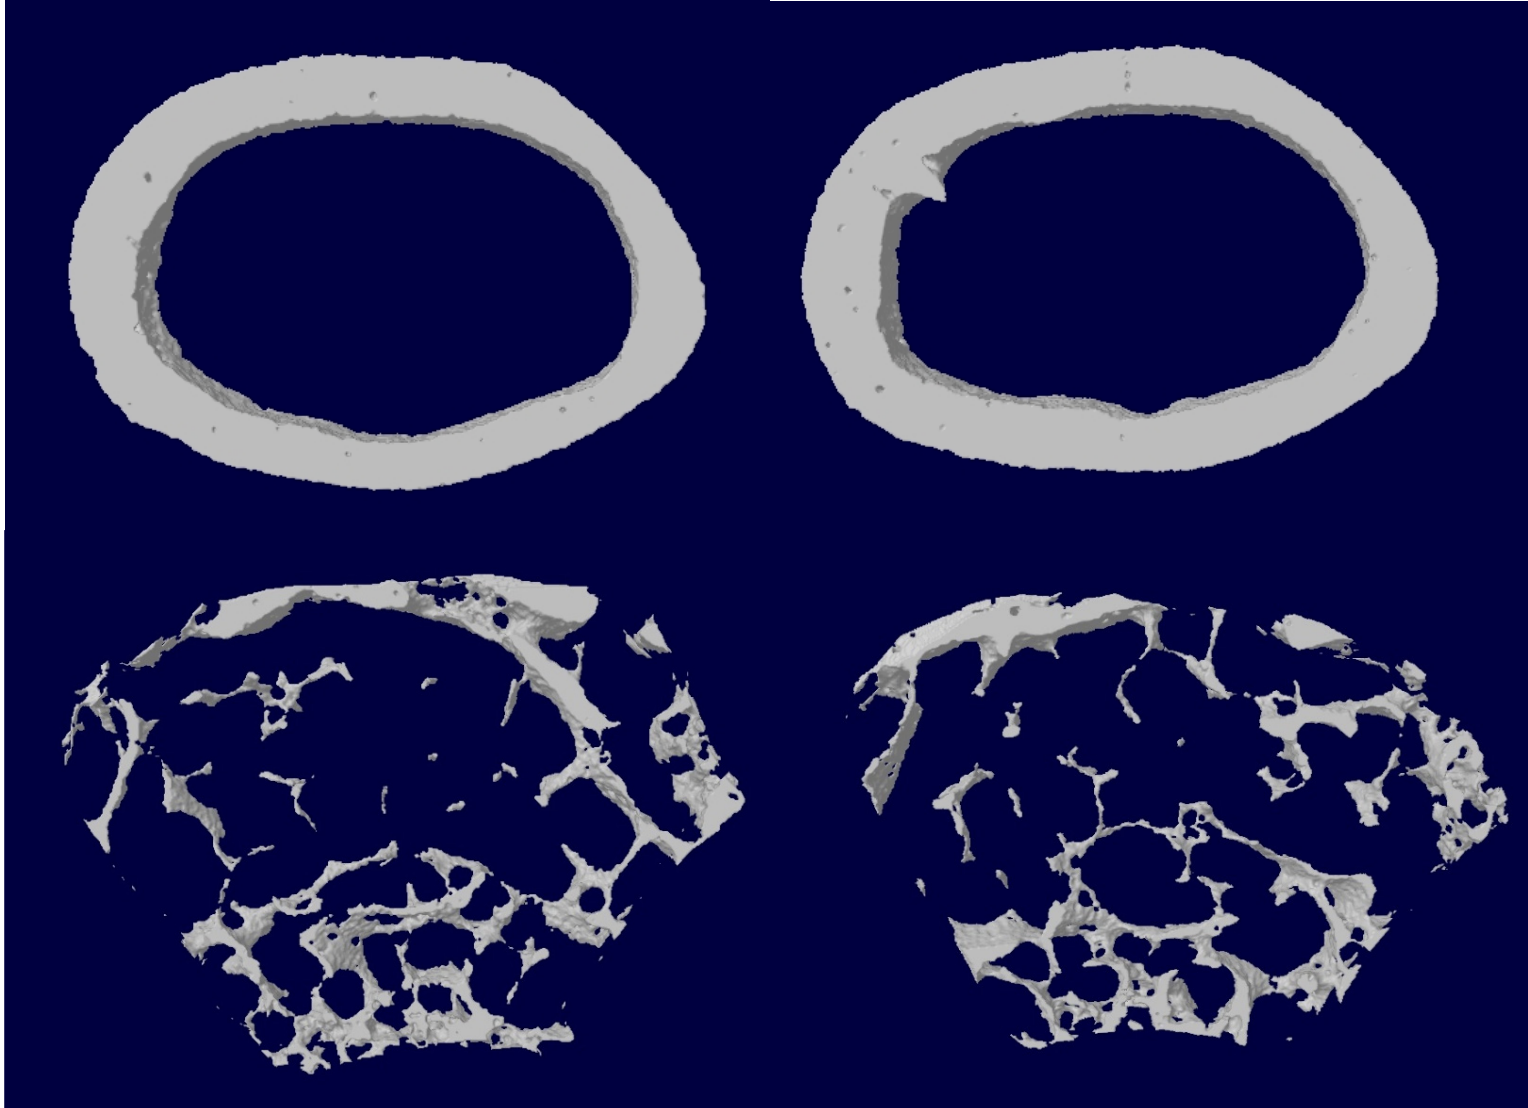

B
