# Supplementary material for: ERα expression in T lymphocytes is dispensable for estrogenic effects in bone
Source: PubMed Central journal article supplement (PMC6026922; doi:10.1530/joe-18-0183), 2018-05-30

**Control**

**Lck-ER $\alpha$ <sup>-/-</sup>**

P

E2

P

E2

**A**

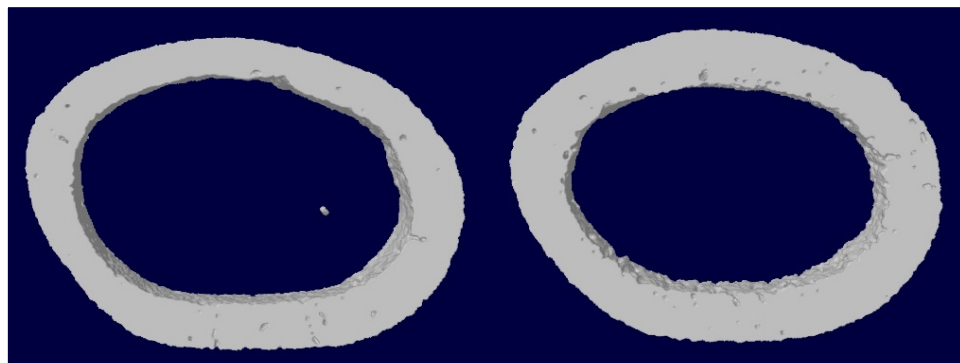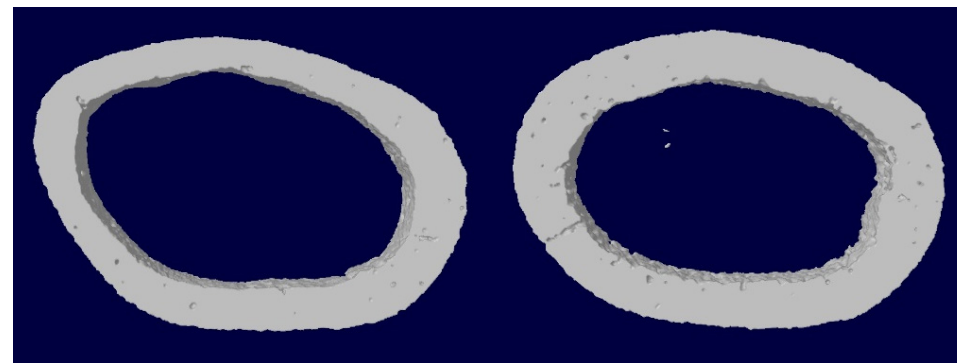

**B**

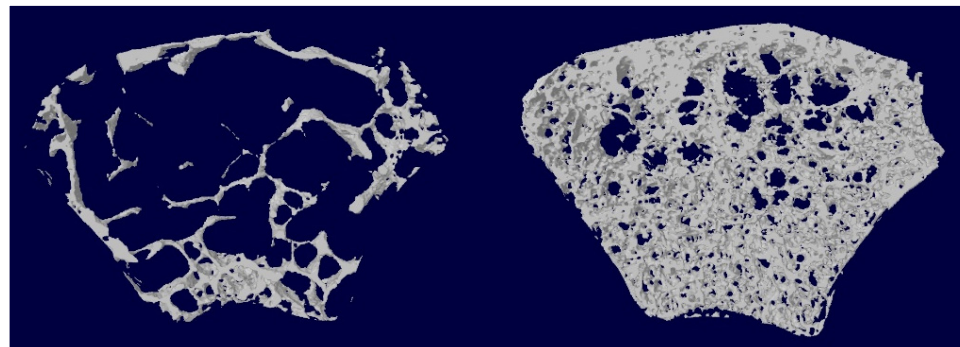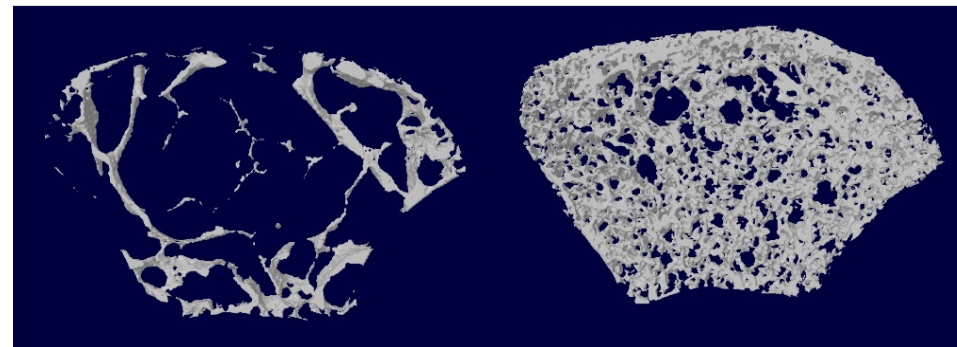

Supplement: joe-238-129-s002.pdf [file joe-238-129-s002.pdf]
